# Supplementary material
Source: publisher site journal article supplement (https://www.dovepress.com/article/477512)
Supplement: Supplementary file 1 [file get_supplementary_file.php]

**Supplementary Material**

**Table of Content:**

**Spectroscopic data of *IND-LPC (5)***

**Figure S1.** 1H NMR spectrum (600 MHz, CDCl3:CD3OD) of *IND-LPC*

**Figure S2.** 13C NMR spectrum (150 MHz, CDCl3:CD3OD) of *IND-LPC*

**Figure S3.** HSQC spectrum (600 MHz, CDCl3:CD3OD) of *IND-LPC*

**Figure S4.** 31P spectrum (243 MHz, CDCl3:CD3OD) of *IND-LPC*

**Spectroscopic data of *IND-PA-PC (6)***

**Figure S5.** 1H NMR spectrum (600 MHz, CDCl3:CD3OD) of *IND-PA-PC*

**Figure S6.** 13C NMR spectrum (150 MHz, CDCl3:CD3OD) of *IND-PA-PC*

**Figure S7.** HSQC spectrum (600 MHz, CDCl3:CD3OD) of *IND-PA-PC*

**Figure S8.** 31P spectrum (243 MHz, CDCl3:CD3OD) of *IND-PA-PC*

**Spectroscopic data of *IND-SA-PC (7)***

**Figure S9.** 1H NMR spectrum (600 MHz, CDCl3:CD3OD) of *IND-SA-PC*

**Figure S10.** 13C NMR spectrum (150 MHz, CDCl3:CD3OD) of *IND-SA-PC*

**Figure S11.** HSQC spectrum (600 MHz, CDCl3:CD3OD) of *IND-SA-PC*

**Figure S12.** 31P spectrum (243 MHz, CDCl3:CD3OD) of *IND-SA-PC*

**Spectroscopic data of *IND-OA-PC (8)***

**Figure S13.** 1H NMR spectrum (600 MHz, CDCl3:CD3OD) of *IND-OA-PC*

**Figure S14.** 13C NMR spectrum (150 MHz, CDCl3:CD3OD) of *IND-OA-PC*

**Figure S15.** HSQC spectrum (600 MHz, CDCl3:CD3OD) of *IND-OA-PC*

**Figure S16.** 31P spectrum (243 MHz, CDCl3:CD3OD) of *IND-OA-PC*

**Spectroscopic data of *PA-IND-PC (18)***

**Figure S17.** 1H NMR spectrum (600 MHz, CDCl3:CD3OD) of *PA-IND-PC*

**Figure S18.** 13C NMR spectrum (150 MHz, CDCl3:CD3OD) of *PA-IND-PC*

**Figure S19.** HSQC spectrum (600 MHz, CDCl3:CD3OD) of *PA-IND-PC*

**Figure S20.** 31P spectrum (243 MHz, CDCl3:CD3OD) of *PA-IND-PC*

**Spectroscopic data of *SA-IND-PC (19)***

**Figure S21.** 1H NMR spectrum (600 MHz, CDCl3:CD3OD) of *SA-IND-PC*

**Figure S22.** 13C NMR spectrum (150 MHz, CDCl3:CD3OD) of *SA-IND-PC*

**Figure S23.** HSQC spectrum (600 MHz, CDCl3:CD3OD) of *SA-IND-PC*

**Figure S24.** 31P spectrum (243 MHz, CDCl3:CD3OD) of *SA-IND-PC*

**Spectroscopic data of *OA-IND-PC (20)***

**Figure S25.** 1H NMR spectrum (600 MHz, CDCl3:CD3OD) of *OA-IND-PC*

**Figure S26.** 13C NMR spectrum (150 MHz, CDCl3:CD3OD) of *OA-IND-PC*

**Figure S27.** HSQC spectrum (600 MHz, CDCl3:CD3OD) of *OA-IND-PC*

**Figure S28.** 31P spectrum (243 MHz, CDCl3:CD3OD) of *OA-IND-PC*

***Supplementary information 1***

***1-Indomethacinoyl-2-hydroxy-sn-glycero-3-phosphocholine (IND-LPC) (5)***

Colorless waxy product, yield 31%, TLC Rf = 0.13 (CHCl3:MeOH:H2O, 65:25:4, v/v/v).**1H NMR (600 MHz, CDCl3:CD3OD, 2:1, v/v) δ:** 2.31 (s, 3H, C**H3**-2'''), 3.16 (s, 9H, N(C**H3**)**3**), 3.59 (m, 2H, CH2-β), 3.72 (s, 2H, CH2-2'),3.81 (s, 4H, -OCH3 and -OH), 3.88 (m, 1H, H-2), 3.96 (m, 2H, CH2-3), 4.16 (m, 2H, CH2-1), 4.26 (m, 2H, CH2-α), 6.65 (m, 1H, H-6'''), 6.87 (m, 1H, H-7'''), 6.95 (m, 1H, H-4'''), 7.47-7.48 (m, 2H, H-4'' and H-6''), 7.63-7.64 (m, 2H, H-3'' and H-7'').**13C NMR (150 MHz, CDCl3:CD3OD, 2:1, v/v) δ:** 13.01 (CH3-2'''), 29.76 (C-2'), 53.94 (N(**C**H3)3), 55.59 (-O**C**H3), 59.42 (C-α), 65.44 (C-1), 66.16 (C-β), 67.15 (C-2), 68.35 (C-3), 101.41 (C-4'''), 111.64 (C-6'''), 112.58 (C-3'''), 114.89 (C-7'''), 129.15 (C-4'' and C-6''), 130.69 (C-7a'''), 130.84 (C-2''), 131.10 (C-3'' and 7''), 133.75 (C-2'''), 135.95 (C-4a'''), 139.41 (C-5''), 156.08 (C-5'''), 168.75 (C-1''), 171.28 (C-1'). **31P NMR (243 MHz, CDCl3:CD3OD, 2:1, v/v) δ:** – 0.60. **ESI-MS** m/z calculated for C27H34ClN2O9P: [M+H]+ 597.1769. Found 597.1774.

***1-Indomethacinoyl-2-hydroxy-sn-glycero-3-phosphocholine*** ***(IND-LPC) (5)***

**
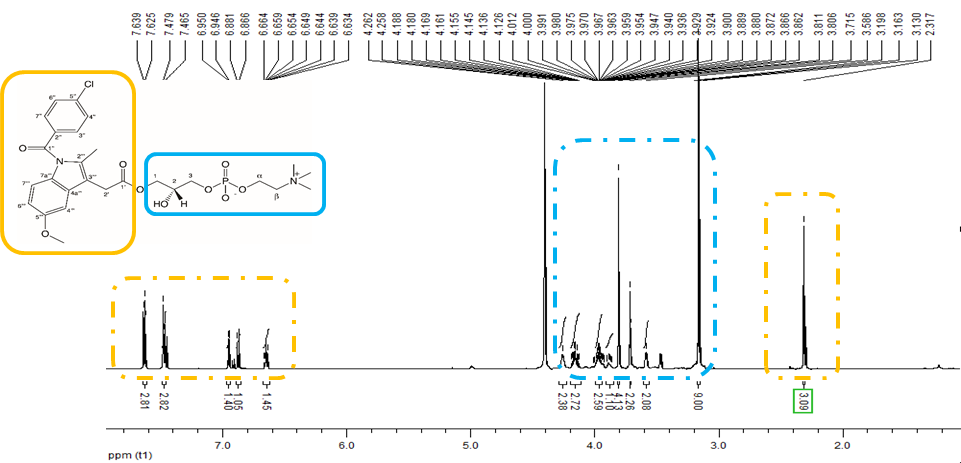
**

**Figure S1.** 1H NMR spectrum (600 MHz, CDCl3:CD3OD) of *IND-LPC.*


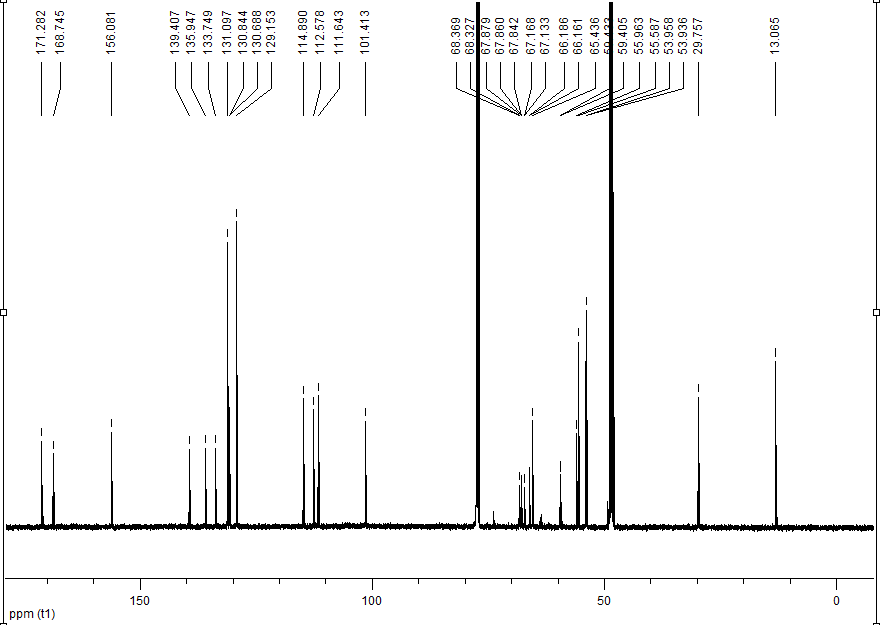

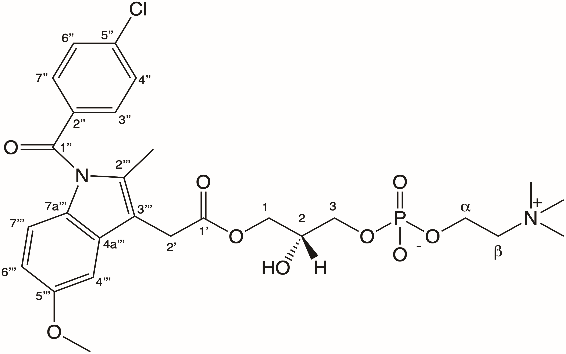


**Figure S2.** 13C NMR spectrum (150 MHz, CDCl3:CD3OD) of *IND-LPC*.


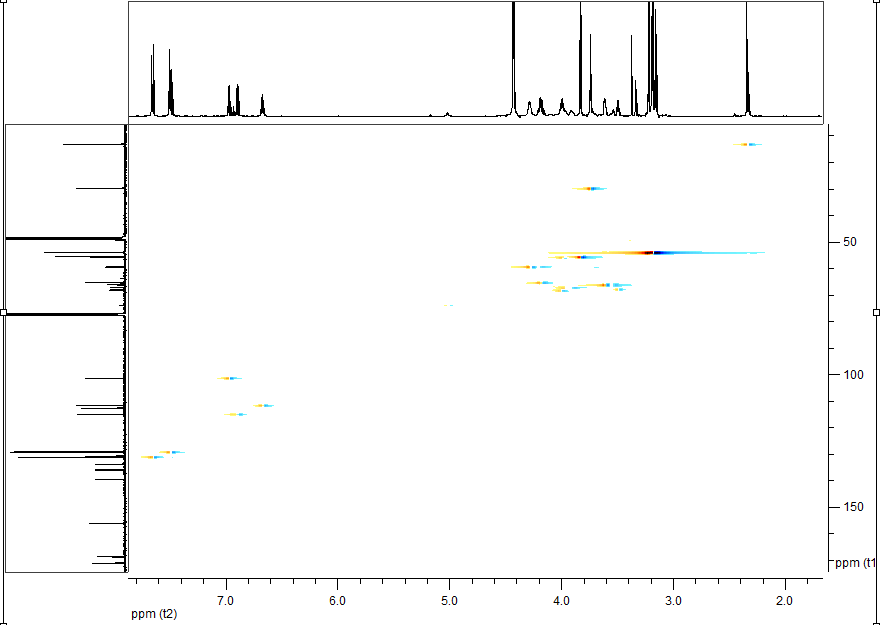


**Figure S3.** HSQC spectrum (600 MHz, CDCl3:CD3OD) of *IND-LPC.*


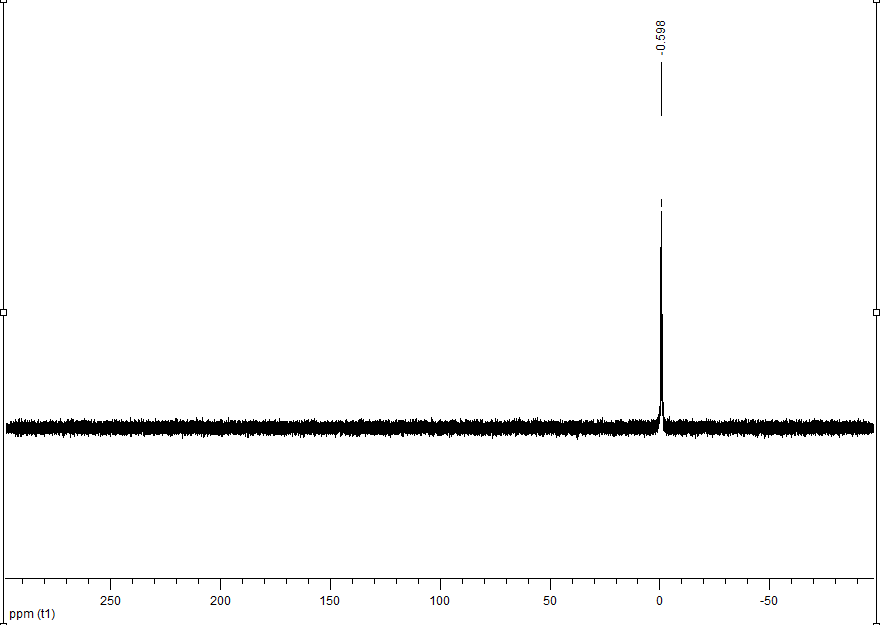


**Figure S4.** 31P spectrum (243 MHz, CDCl3:CD3OD) of *IND-LPC*.

***Supplementary information 2***

***1-Indomethacinoyl-2-palmitoyl-sn-glycero-3-phosphocholine (IND-PA-PC) (6)***

Light yellow waxy product, yield 50%, TLC Rf = 0.28 (CHCl3: MeOH: H2O, 65:25:4, v/v/v). **1H NMR (600 MHz, CDCl3:CD3OD, 2:1, v/v) δ:** 0.71 (t, *J* = 6.8 Hz, 3H, C**H3**(CH2)13CH2C(O)), 1.09 (m, 26H, CH3(C**H2**)13CH2C(O)), 2.13-2.31 (m, 5H, CH3(CH2)13C**H2**C(O), C**H3**-2'''), 3.05 (s, 9H, N(C**H3**)**3**), 3.18 (m, 2H, CH2-β), 3.22 (m, 5H, H-2' and -OCH3), 3.46 (m, 2H, CH2-3), 3.53 (m, 1H, one of H-1), 3.67 (m, 2H, CH2-α), 3.68 (m, 2H, one of H-1), 5.06 (m, 1H, H-2), 6.56 (m, 1H, H-6'''), 6.72 (m, 1H, H-7'''), 6.88 (m, 1H, H-4'''), 7.32-7.35 (m, 2H, H-4'' and H-6''), 7.49-7.53 (m, 2H, H-3'' and H-7''). **13C NMR (150 MHz, CDCl3:CD3OD, 2:1, v/v) δ:** 13.88 (CH3-2''' and CH3(CH2)13CH2C(O)), 29.03, 29.26, 29.49, 29.54, 29.56, 29.58, 29.59, 34.06, 39.85 CH3(CH2)14C(O)), 31.84 (C-2'), 53.96 (N(CH3)**3**), 55.04 (-OCH3), 57.62 (C-α), 59.35 (C-1), 62.21 (C-3), 64.44 (C-β), 66.2 (C-2), 106.98 (C-4''' and C-6'''), 112.44 (C-3'''), 114.80 (C-7'''), 128.64 (C-4'' and C-6''), 129.12 (C-7a''' and C-2''), 131.09 (C-3'' and C-7''), 133.77 (C-2'''), 136.04 (C-4a'''), 139.39 (C-5''), 155.97 (C-5'''), 168.72 (C-1''), 170.90 (C-1'), 173.93 ((CH3(CH2)13CH2C(O)). **31P NMR (243 MHz, CDCl3:CD3OD, 2:1, v/v) δ:** – 5.37. **ESI-MS** m/z calculated for C43H64ClN2O10P: [M+H]+ 835.4066. Found 835.4065.

***1-Indomethacinoyl-2-palmitoyl-sn-glycero-3-phosphocholine (IND-PA-PC) (6)***


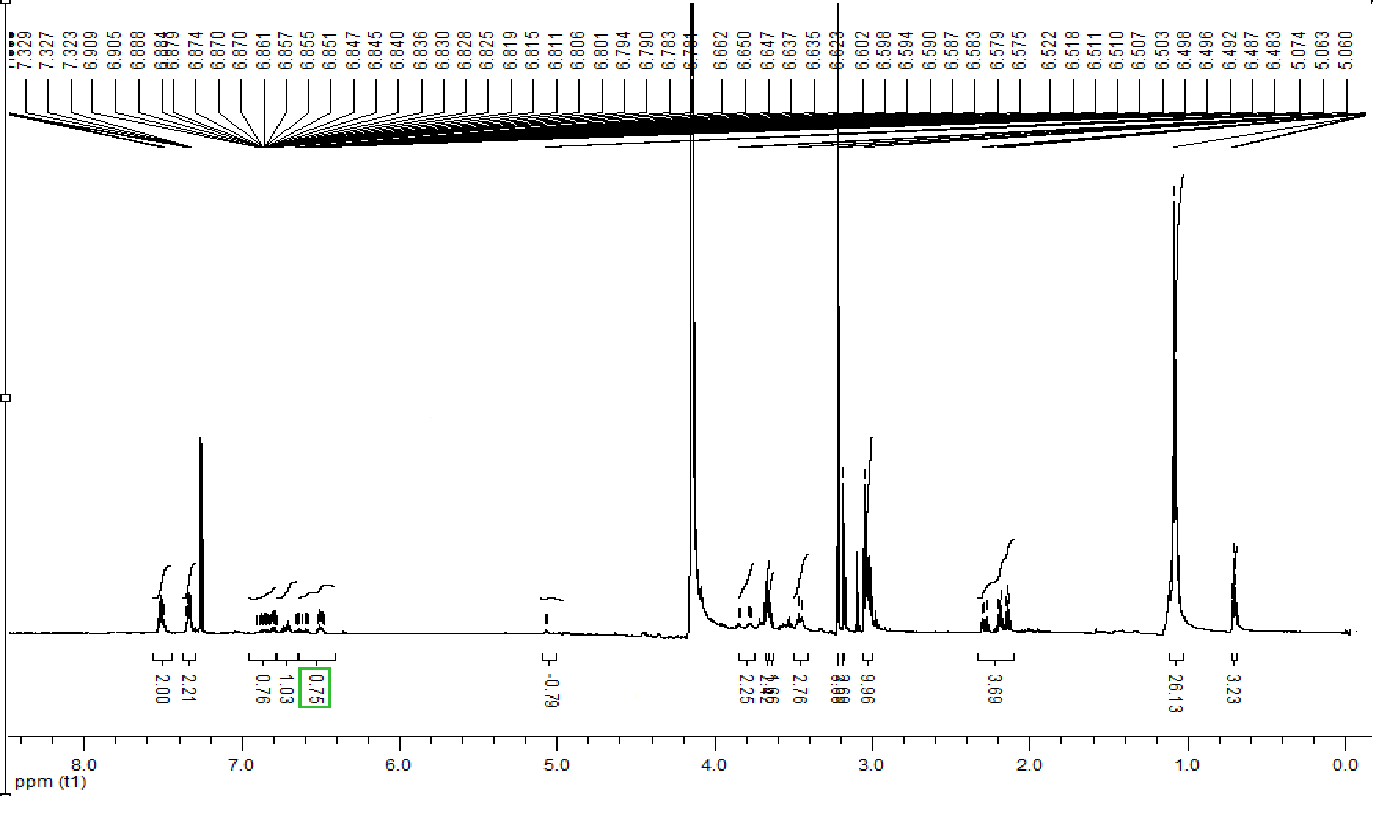


**Figure S5.** 1H NMR spectrum (600 MHz, CDCl3:CD3OD) of *IND-PA-PC***.**


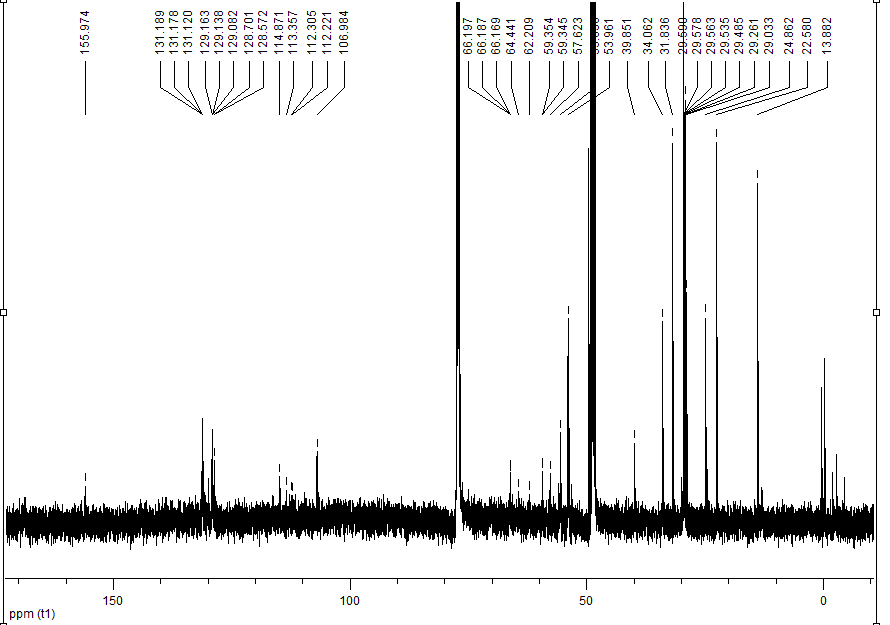


**Figure S6.** 13C NMR spectrum (150 MHz, CDCl3:CD3OD) of *IND-PA-PC*.


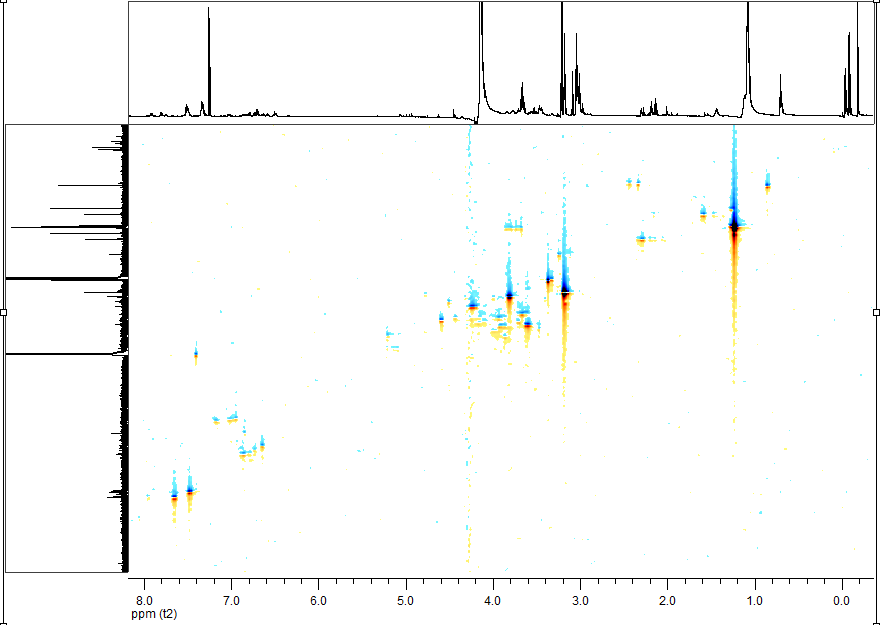


**Figure S7.** HSQC spectrum (600 MHz, CDCl3:CD3OD) of *IND-PA-PC*.


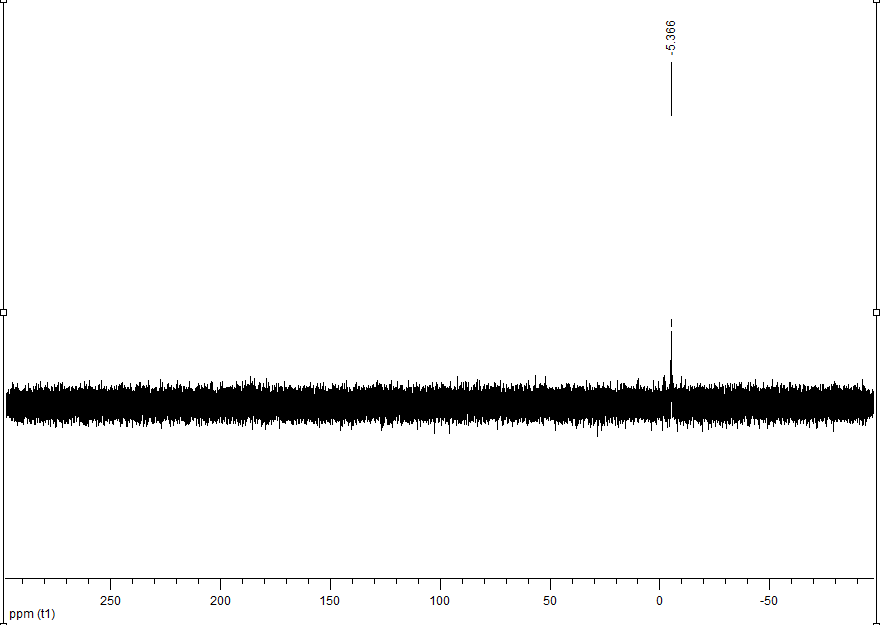


**Figure S8.** 31P spectrum (243 MHz, CDCl3:CD3OD) of *IND-PA-PC*.

***Supplementary information 3***

***1-Indomethacinoyl-2-stearoyl-sn-glycero-3-phosphocholine (IND-SA-PC) (7)***

Light yellow waxy product, yield 34%. TLC Rf = 0.30 (CHCl3: MeOH: H2O, 65:25:4, v/v/v).**1H NMR (600 MHz, CDCl3:CD3OD, 2:1, v/v) δ:** 0.65 (t, *J* = 6.4 Hz, 3H, C**H3**(CH2)16C(O)), 1.03 (m, 32H, CH3(C**H2**)16C(O)), 2.13 (s, 3H, C**H3**-2'''), 2.97 (s, 9H, N(C**H3**)**3**), 3.40-3.43 (m, 2H, CH2-β), 3.48-3.55 (m, 2H, H-2'), 3.62 (m, 3H, -OCH3), 3.73-3.79 (m, 2H, CH2-3), 3.93 (m, 1H, one of H-1), 4.03 (m, 2H, CH2-α), 4.39 (m, 2H, one of H-1), 5.01 (m, 1H, H-2), 6.45 (m, 1H, H-6'''), 6.61 (m, 1H, H-7'''), 6.79 (m, 1H, H-4'''), 7.28-7.29 (m, 2H, H-4'' i H-6''), 7.43-7.48 (m, 2H, H-3'' i H-7''). **13C NMR (150 MHz, CDCl3:CD3OD, 2:1, v/v) δ:** 13.81 (CH3-2''' and C**H3**(CH2)16C(O)), 29.01, 29.12, 29.25, 29.33, 29.46, 29.54, 29.59, 34.02 CH3(CH2)14C(O)), 31.82 (C-2'), 53.92 (N(CH3)**3**), 55.57 (C-α), 59.35 (C-1), 63.39 (C-3), 63.78 (C-β), 66.18 (C-2), 111.50 (C-4''' i C-6'''), 112.33 (C-3'''), 114.87 (C-7'''), 128.62 (C-4'' and C-6''), 129.16 (C-7a''' and C-2''), 131.11 (C-3'' and C-7''), 133.71 (C-2'''), 136.03 (C-4a'''), 139.44 (C-5''), 156.05 (C-5'''), 168.69 (C-1''), 171.12 (C-1'), 173.71 ((CH3(CH2)13CH2C(O)). **31P NMR (243 MHz, CDCl3:CD3OD, 2:1, v/v) δ:** – 4.86.**ESI-MS** m/z calculated for C45H68ClN2O10P: [M+H]+ 863,4379. Found 863.4368.

***1-Indomethacinoyl-2-stearoyl-sn-glycero-3-phosphocholine (IND-SA-PC) (7)***


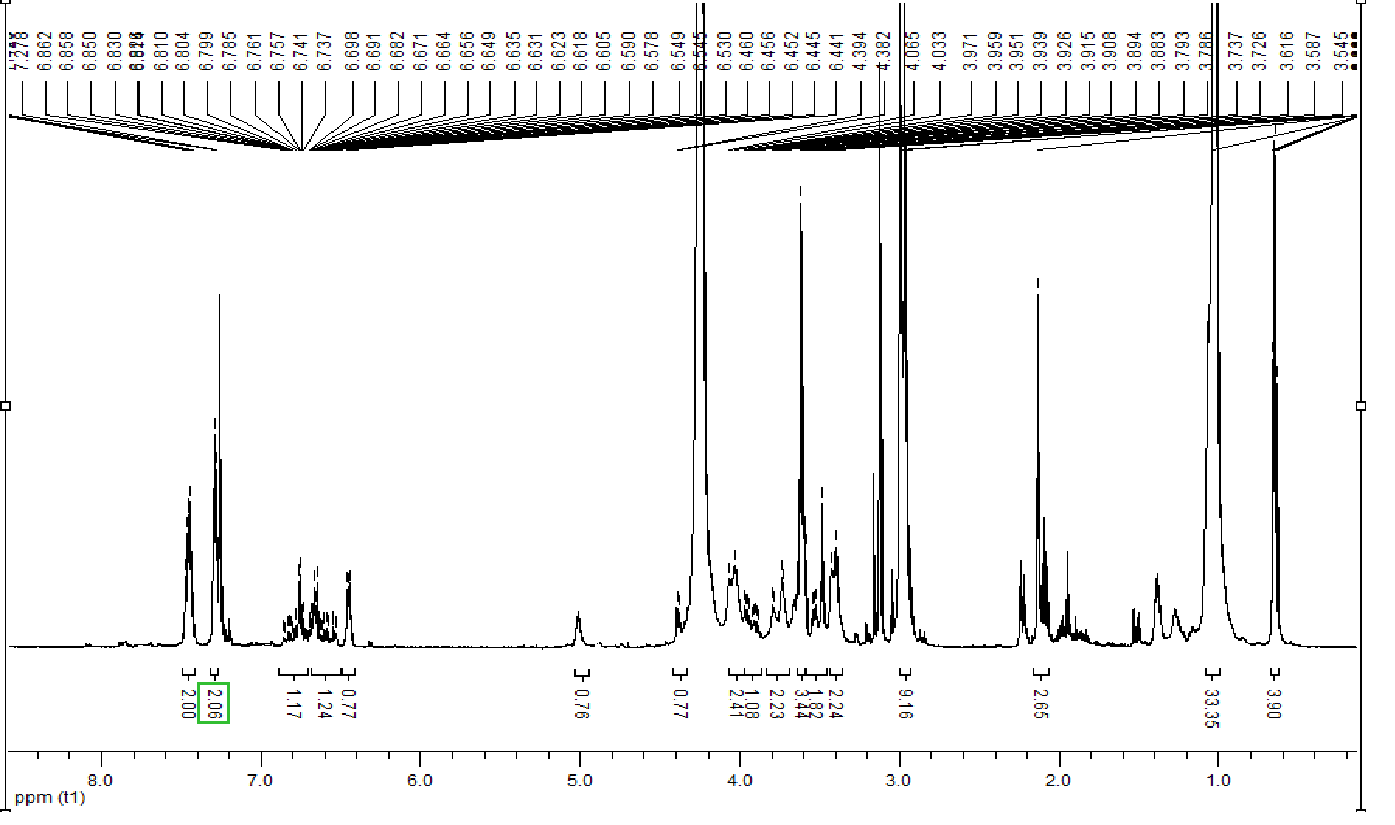


**Figure S9.** 1H NMR spectrum (600 MHz, CDCl3:CD3OD) of *IND-SA-PC*.


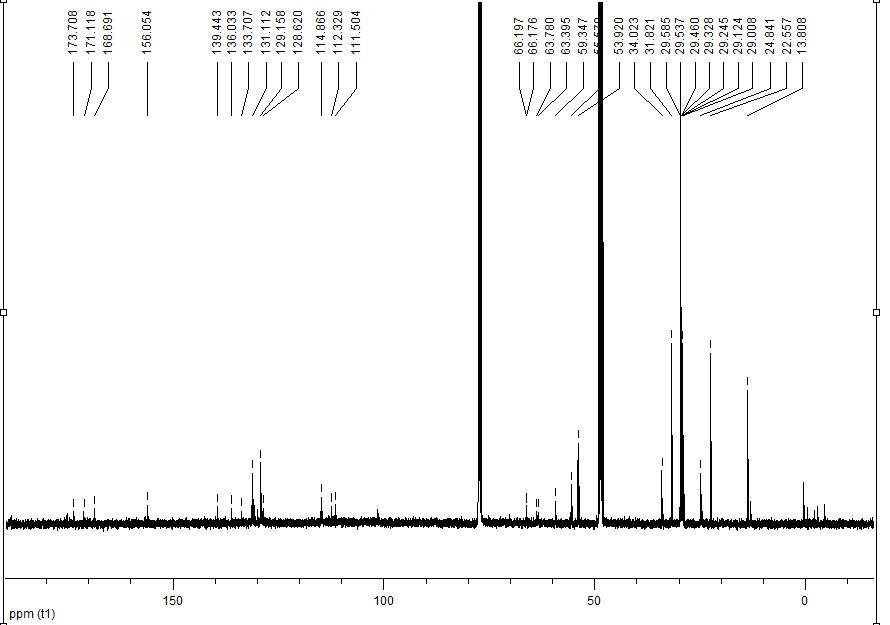


**Figure S10.** 13C NMR spectrum (150 MHz, CDCl3:CD3OD) of *IND-SA-PC*.


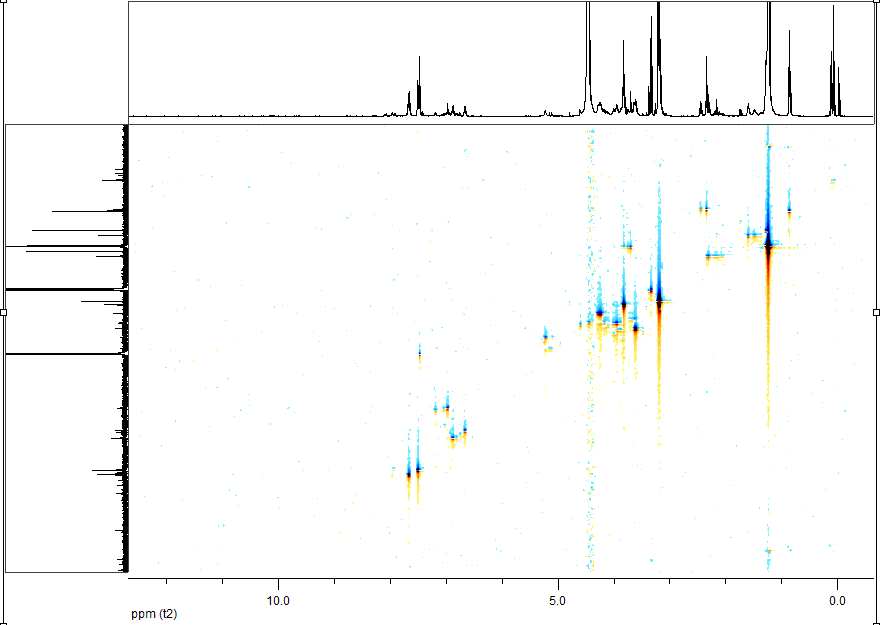


**Figure S11.** HSQC spectrum (600 MHz, CDCl3:CD3OD) of *IND-SA-PC*.


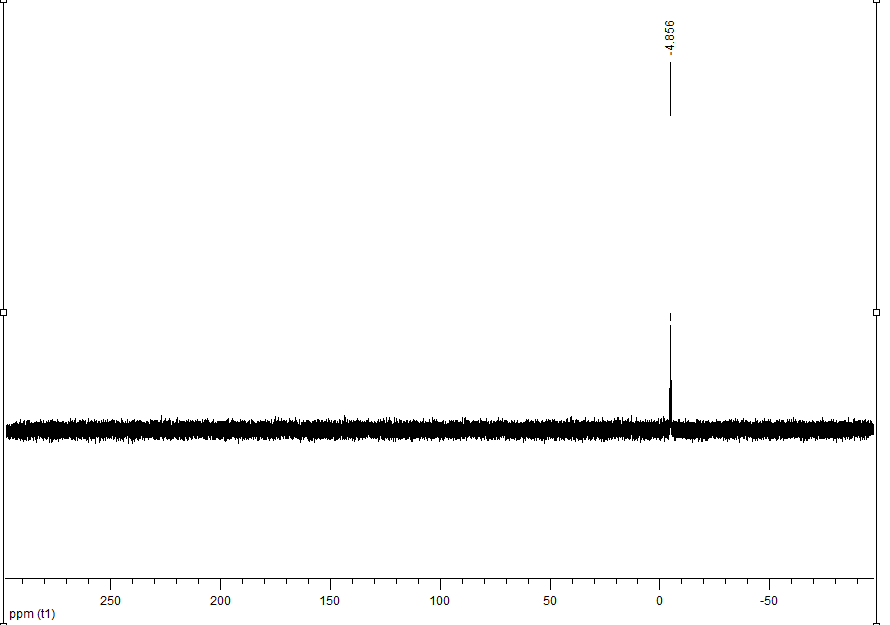


**Figure S12.** 31P spectrum (243 MHz, CDCl3:CD3OD) of *IND-SA-PC*.

***Supplementary information 4***

***1-Indomethacinoyl-2-oleoyl-sn-glycero-3-phosphocholine (IND-OA-PC) (8)***

Light yellow waxy product, yield 25%, TLC Rf = 0.38 (CHCl3: MeOH: H2O, 65:25:4, v/v/v).

**1H NMR (600 MHz, CDCl3:CD3OD, 2:1, v/v) δ:** 0.84 (t, *J* = 6.8 Hz, 3H, C**H3**(CH2)16C(O)), 1.25-1.29 (m, 24H, CH3(CH2)7 CHCH(CH2)7C(O)), 1.98 (m, 2H, C(O)CH2C**H2**-), 2.08-2.22 (m, 2H, C(O)C**H2**CH2-), 2.34 (s, 3H, C**H3**-2'''), 3.17 (s, 9H, N(C**H3**)**3**), 3.59-3.63 (m, 2H, CH2-β), 3.69 (s, 2H, H-2'), 3.83 (s, 3H, -OCH3), 3.94-3.96 (m, 2H, CH2-3), 4.16 (m, 1H, one of H-1), 4.24 (m, 2H, CH2-α), 4.44 (m, 2H, one of H-1), 5.22 (m, 1H, H-2), 5.30-5.32 (m, 2H, CH=CH), 6.65 (m, 1H, H-6'''), 6.97 (m, 1H, H-7'''), 6.97 (m, 1H, H-4'''), 7.48-7.50 (m, 2H, H-4'' and H-6''), 7.65-7.67 (m, 2H, H-3'' and H-7''). **13C NMR (150 MHz, CDCl3:CD3OD, 2:1, v/v) δ:** 13.08 and 13.79 (CH3-2''' and C**H3**(CH2)7CHCH(CH2)7C(O)), 24.63 (CH3(CH2)7CHCH(CH2)5CH2CH2C(O)), 22.55, 27.05, 28.97, 29.04, 29.07, 29.19, 29.21, 29.40, 29.60, 29.64, 31.80 (CH3(CH2)7CHCH(CH2)5CH2CH2C(O)), 29.97 (C-2'), 33.68 (CH3(CH2)7CHCH(CH2)5CH2CH2C(O)), 53.94 (N(CH3)**3**), 55.56 (-OCH3), 59.15 (C-α), 62.28 (C-1), 63.82 (C-3), 66.25 (C-β), 71.20 (C-2), 101.53 (C-4'''), 111.57 (C-6''') , 112.39 (C-3'''), 114.85 (C-7'''), 129.16 (C-4'' and C-6''), 129.59 and 129.90 (CH=CH), 130.63 and 130.83 (C-7a''' and C-2''), 131.10 (C-3'' and C-7''), 133.73 (C-2'''), 136.00 (C-4a'''), 139.45 (C-5''), 156.09 (C-5'''), 168.70 (C-1''), 170.62 (C-1'), 173.76 CH3(CH2)7CHCH(CH2)7**C**(O)), **31P NMR (243 MHz, CDCl3:CD3OD, 2:1, v/v) δ:** – 0.90.**ESI-MS** m/z calculated for C45H66ClN2O10P: [M+H]+ 861,4222. Found 861.4225.

***1-Indomethacinoyl-2-oleoyl-sn-glycero-3-phosphocholine (IND-OA-PC) (8)***


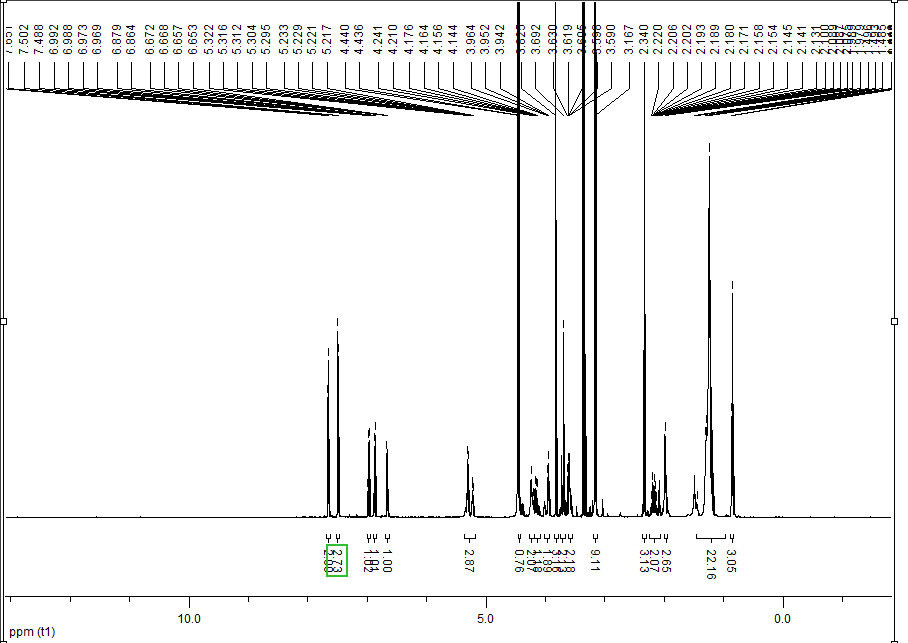


**Figure S13.** 1H NMR spectrum (600 MHz, CDCl3:CD3OD) of *IND-OA-PC*.


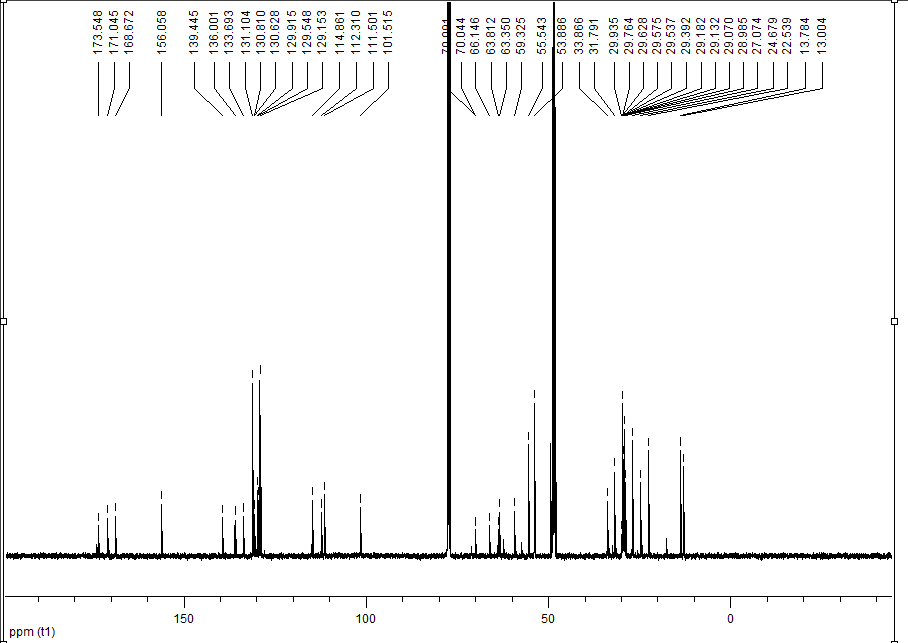


**Figure S14.** 13C NMR spectrum (150 MHz, CDCl3:CD3OD) of *IND-OA-PC*.


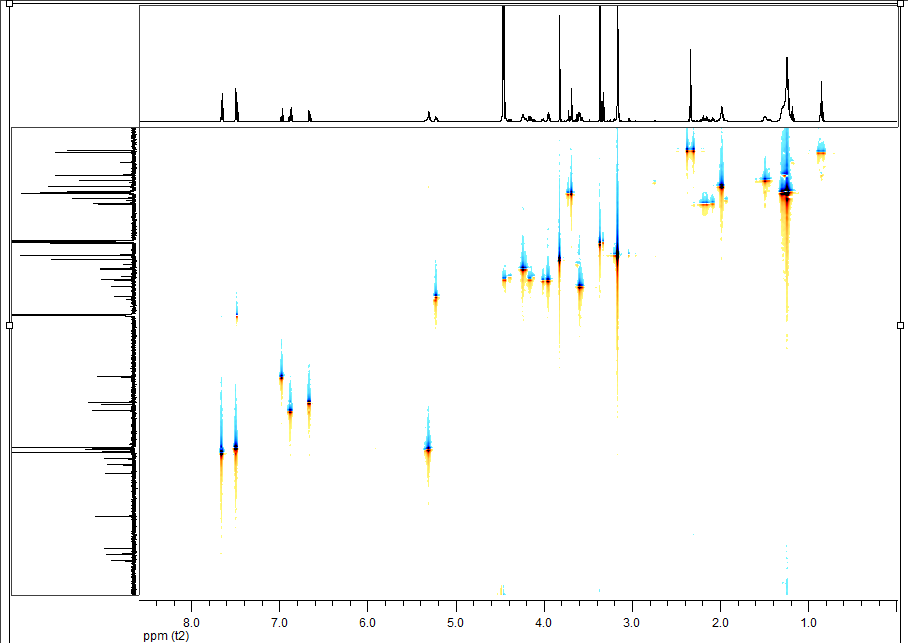


**Figure S15.** HSQC spectrum (600 MHz, CDCl3:CD3OD) of *IND-OA-PC*.


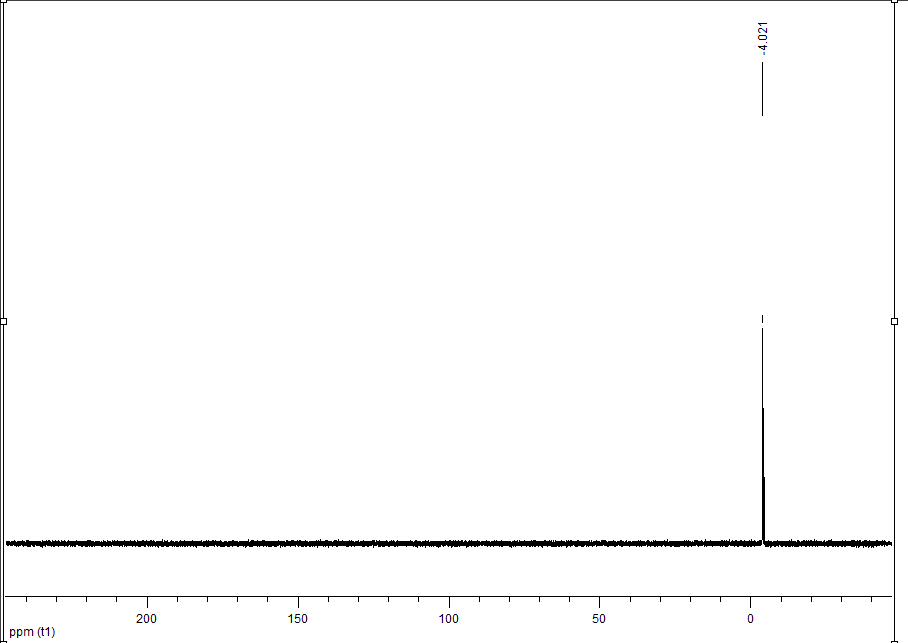


**Figure S16.** 31P spectrum (243 MHz, CDCl3:CD3OD) of *IND-OA-PC*.

***Supplementary information 5***

***1-Palmitoyl-2-indomethacinoyl-sn-glycero-3-phosphocholine (PA-IND-PC) (18)***

Light yellow waxy product, yield 45%. TLC Rf = 0.3 (CHCl3: MeOH: H2O, 65:25:4, v/v/v). **1H NMR (600 MHz, CDCl3:CD3OD, 2:1, v/v) δ:** 0.56 (t, *J* = 6.8 Hz, 3H, C**H3**(CH2)13CH2C(O)), 0.95 (m, 24H, CH3CH2(C**H2**)12CH2C(O)), 1.02 (m, 2H, CH3C**H2**(CH2)12CH2C(O)), 2.0 (t, *J* = 6.8 Hz, 3H, CH3(CH2)13C**H2**C(O)), 2.05 (s, 3H, C**H3**-2'''), 2.89 (s, 9H, N(C**H3**)**3**), 3.30 (m, 2H, CH2-β), 3.44 (s, 2H, CH2-2'),3.53 (s, 3H, -OCH3), 3.72 (m, 2H, CH2-3), 3.82 (dd, *J* = 12.1, 2.8 Hz, 1H, one of H-1), 3.93 (m, 2H, CH2-α), 4.1 (dd, *J* = 12.1, 2.8 Hz, 1H, one of H-1), 4.94 (m, 1H, H-2), 6.37 (m, 1H, H-6'''), 6.60 (m, 1H, H-7'''), 6.70 (m, 1H, H-4'''), 7.20-7.21 (m, 2H, H-4'' and H-6''), 7.35-7.37 (m, 2H, H-3'' and H-7''). **13C NMR (150 MHz, CDCl3:CD3OD, 2:1, v/v) δ:** 12.92 (CH3-2'''), 13.66 (**C**H3(CH2)13CH2C(O)), 28.96, 29.08, 29.12, 29.21, 29.28, 29.52, 29.53, 31.79, 33.59, (CH3CH2(**C**H2)11CH2CH2C(O)), 33.92 (CH3(CH2)13**C**H2C(O)), 31.79 (C-2'), 53.80 (N(**C**H3)3), 55.44 (-O**C**H3), 59.37 (C-α), 62.36 (C-1), 63.84 (C-3), 65.52 (C-β), 66.13 68.37 (C-2), 101.63 (C-4'''), 111.42 (C-6'''), 112.44 (C-3'''), 114.80 (C-7'''), 128.64 (C-4'' and C-6''), 129.12 (C-7a''' i C-2''), 131.09 (C-3'' and 7''), 133.77 (C-2'''), 136.04 (C-4a'''), 139.39 (C-5''), 156.10 (C-5'''), 168.72 (C-1''), 170.90 (C-1'), 173.93 ((CH3(CH2)13CH2C(O)). **31P NMR (243 MHz, CDCl3:CD3OD, 2:1, v/v) δ:** – 4.68. **ESI-MS** m/z calculated for C43H64ClN2O10P: [M+H]+ 835,4066. Found 835.4069.

***1-Palmitoyl-2-indomethacinoyl-sn-glycero-3-phosphocholine (PA-IND-PC) (18)***


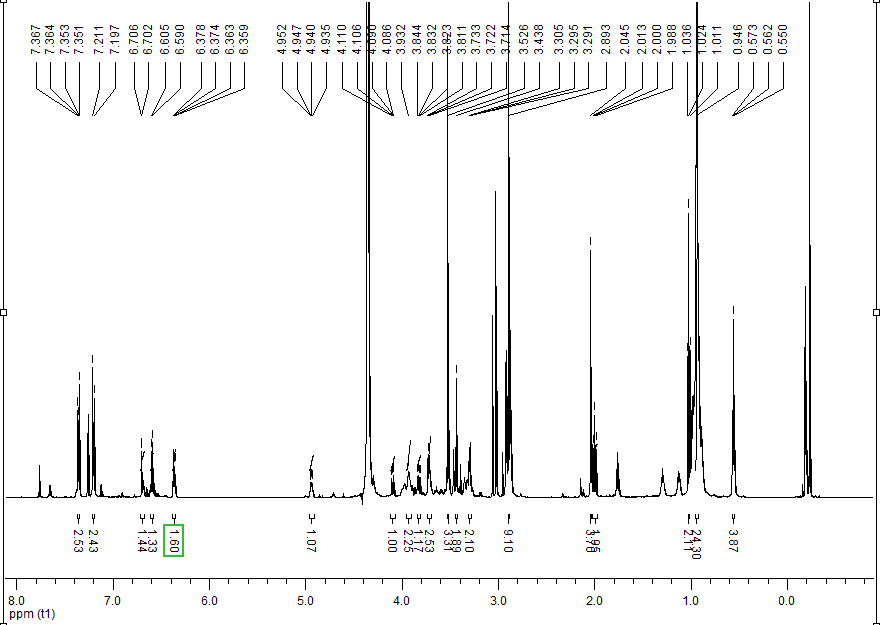


**Figure S17.** 1H NMR spectrum (600 MHz, CDCl3:CD3OD) of *PA-IND-PC.*


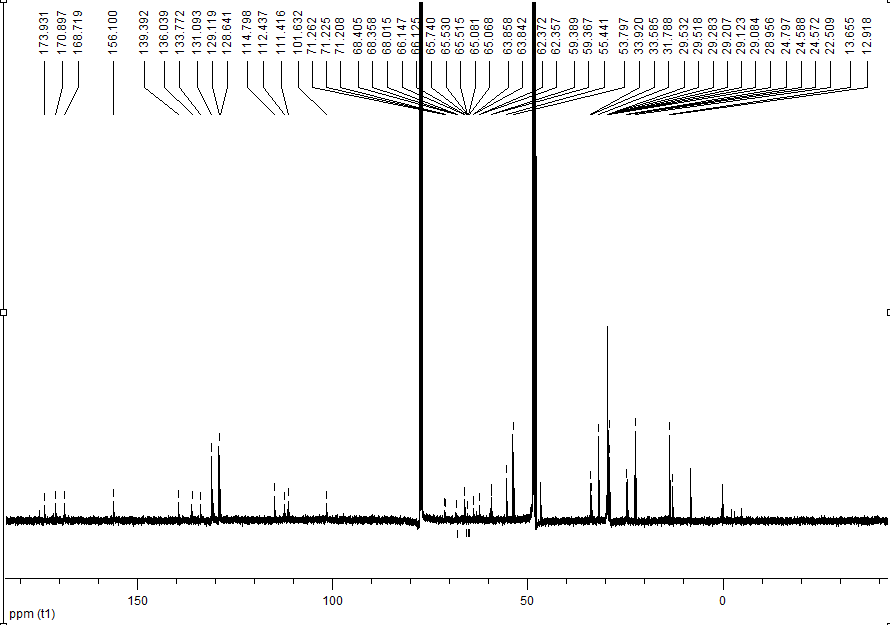


**Figure S18.** 13C NMR spectrum (150 MHz, CDCl3:CD3OD) of *PA-IND-PC*.


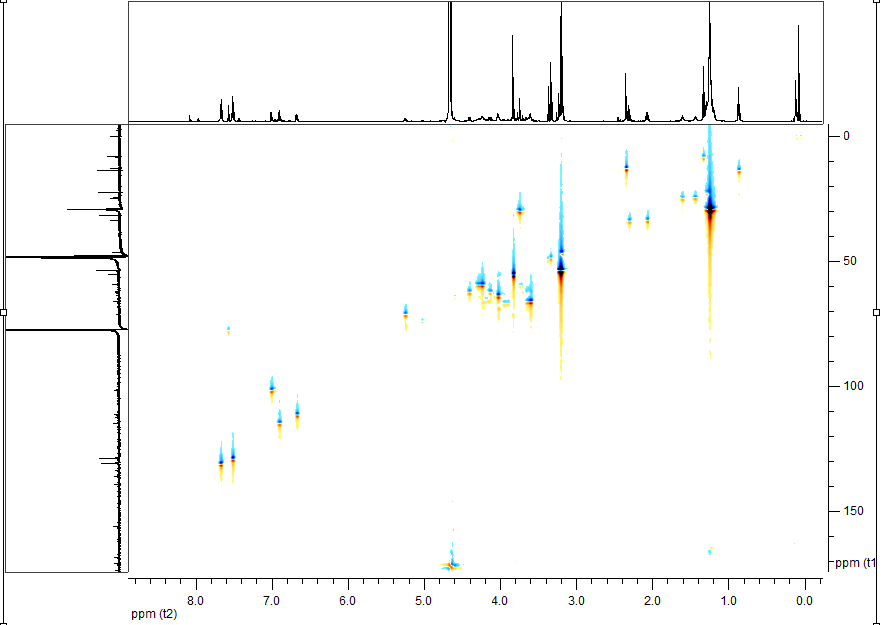


**Figure S19.** HSQC spectrum (600 MHz, CDCl3:CD3OD) of *PA-IND-PC*.


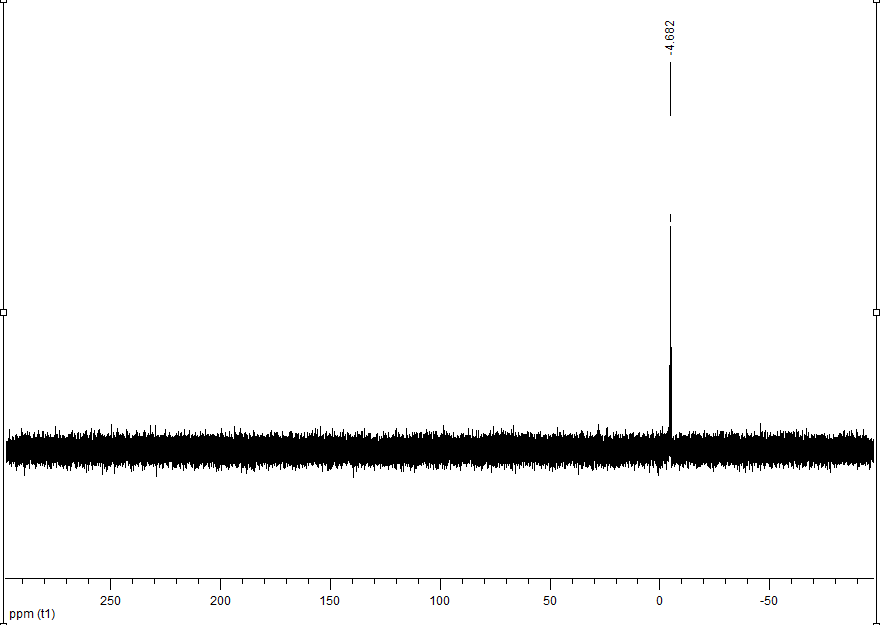


**Figure S20.** 31P spectrum (243 MHz, CDCl3:CD3OD) of *PA-IND-PC*.

***Supplementary information 6***

***1-Stearoyl-2-indomethacinoyl-sn-glycero-3-phosphocholine (SA-IND-PC) (19)***

Light yellow waxy product, yield 26%. TLC Rf = 0.3 (CHCl3: MeOH: H2O, 65:25:4, v/v/v). **1H NMR (600 MHz, CDCl3:CD3OD, 2:1, v/v) δ:** 0.70 (t, *J* = 6.8 Hz, 3H, C**H3**(CH2)13CH2C(O)), 1.08 (m, 30H, CH3(C**H2**)15CH2C(O)), 2.12-2.19 (m, 4H, CH3(CH2)13C**H2**C(O), C**H3**-2'''), 3.01 (s, 9H, N(C**H3**)**3**), 3.45 (m, 2H, CH2-β), 3.52 (m, 1H, CH2-2'),3.66 (s, 3H, -OCH3), 3.81 (m, 2H, CH2-3), 3.94-4.15 (m, 5H, CH2-1, CH2-α), 5.06 (m, 1H, H-2), 6.50 (m, 1H, H-6'''), 6.71 (m, 1H, H-7'''), 6.81 (m, 1H, H-4'''), 7.32-7.34 (m, 2H, H-4'' and H-6''), 7.49-7.50 (m, 2H, H-3'' and H-7''). **13C NMR (150 MHz, CDCl3:CD3OD, 2:1, v/v) δ:** 13.04 (CH3-2'''), 13.87 (**C**H3(CH2)13CH2C(O)), 29.03, 29.14, 29.26, 29.35, 29.49, 29.53, 29.56, 29.58, 29.61 (CH3CH2(**C**H2)11CH2CH2C(O)), 34.06 (CH3(CH2)13**C**H2C(O)), 31.84 (C-2'), 53.95 (N(**C**H3)3), 55.63 (-O**C**H3), 59.38 (C-α), 62.45 (C-1), 63.84 (C-3), 65.52 (C-β), 66.18 (C-2), 101.36 (C-4'''), 111.62 (C-6'''), 112.49 (C-3'''), 114.90 (C-7'''), 128.70 (C-4'' and C-6''), 129.17 (C-7a''' and C-2''), 131.13 (C-3'' and 7''), 133.78 (C-2'''), 135.93 (C-4a'''), 139.42 (C-5''), 156.01 (C-5'''), 168.71 (C-1''), 174.06 (C-1'), 175.11 ((CH3(CH2)13CH2C(O)). **31P NMR (243 MHz, CDCl3:CD3OD, 2:1, v/v) δ:** – 4.67. **ESI-MS** m/z calculated for C45H68ClN2O10P: [M+H]+ 863.4379. Found 863.4368.

***1-Stearoyl-2-indomethacinoyl-sn-glycero-3-phosphocholine (SA-IND-PC) (19)***


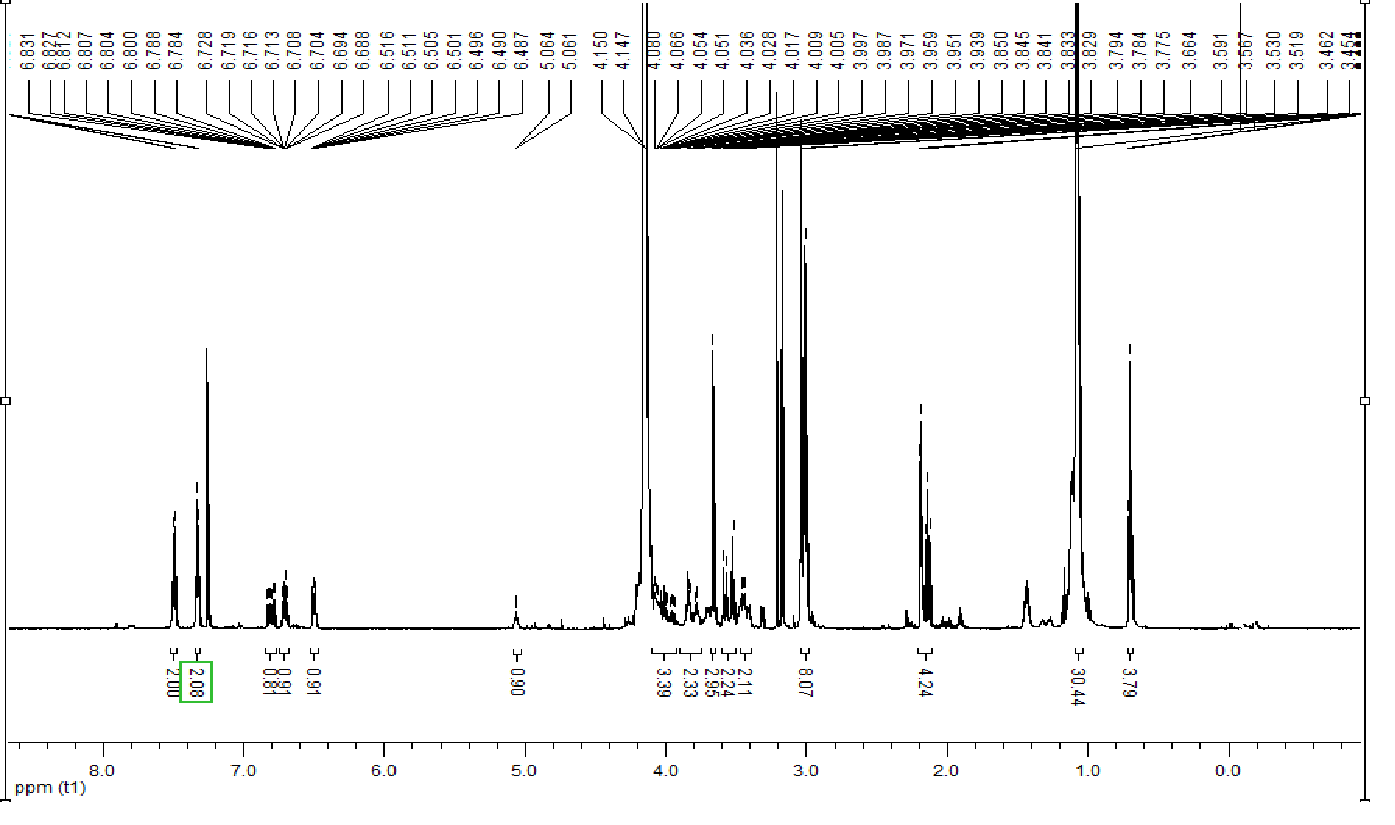


**Figure S21.** 1H NMR spectrum (600 MHz, CDCl3:CD3OD) of *SA-IND-PC.*


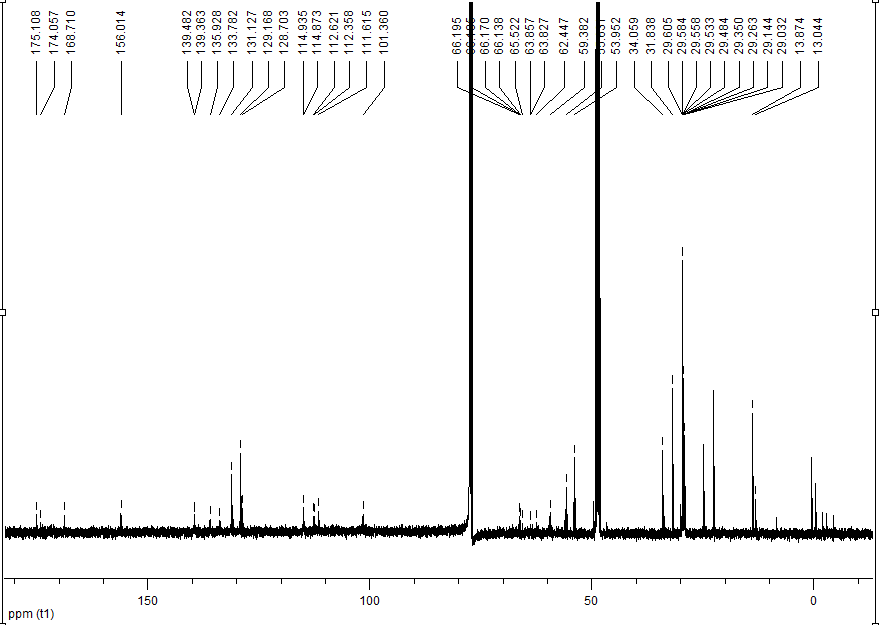


**Figure S22.** 13C NMR spectrum (150 MHz, CDCl3:CD3OD) of *SA-IND-PC*.


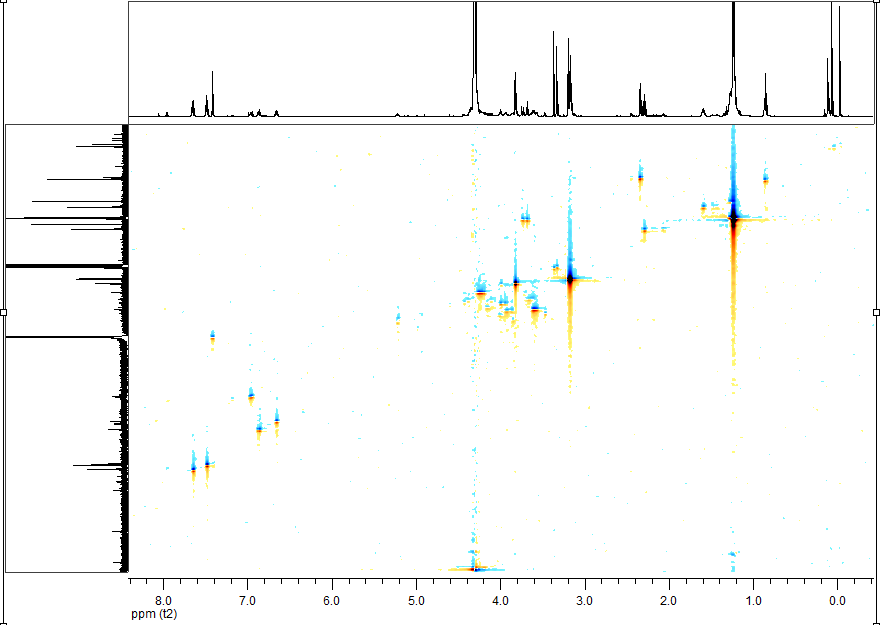


**Figure S23.** HSQC spectrum (600 MHz, CDCl3:CD3OD) of *SA-IND-PC*.


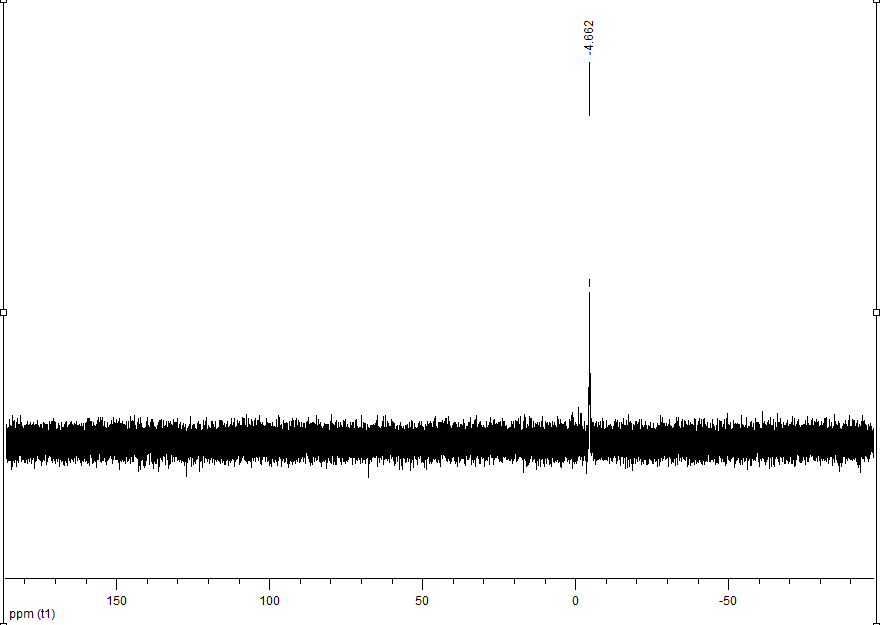


**Figure S24.** 31P spectrum (243 MHz, CDCl3:CD3OD) of *SA-IND-PC*.

***Supplementary information 7***

***1-Oleoyl-2-indomethacinoyl-sn-glycero-3-phosphocholine (OA-IND-PC) (20)***

Light yellow waxy product, yield 65%, TLC Rf = 0.29 (CHCl3: MeOH: H2O, 65:25:4, v/v/v).

**1H NMR (600 MHz, CDCl3:CD3OD, 2:1, v/v) δ:** 0.87 (t, *J* = 6.8 Hz, 3H, C**H3**(CH2)16C(O)), 1.24-1.30 (m, 24H, CH3(CH2)7 CHCH(CH2)7C(O)), 1.99 (m, 2H, C(O)CH2C**H2**-), 2.11-2.13 (m, 2H, C(O)C**H2**CH2-), 2.34 (s, 3H, C**H3**-2'''), 3.17 (s, 9H, N(C**H3**)**3**), 3.53-3.54 (m, 2H, CH2-β), 3.73 (s, 2H, H-2'), 3.84 (s, 3H, -OCH3), 4.03-4.06 (m, 2H, CH2-3), 4.14 (m, 1H, one of H-1), 4.18 (m, 2H, CH2-α), 4.41 (m, 2H, one of H-1), 5.25 (m, 1H, H-2), 5.31-5.33 (m, 2H, CH=CH), 6.68 (m, 1H, H-6'''), 6.93 (m, 1H, H-7'''), 7.00 (m, 1H, H-4'''), 7.49-7.51 (m, 2H, H-4'' and H-6''), 7.66-7.67 (m, 2H, H-3'' and H-7''). **13C NMR (150 MHz, CDCl3:CD3OD, 2:1, v/v) δ:** 13.00 and 13.78 (CH3-2''' and C**H3**(CH2)7CHCH(CH2)7C(O)), 24.68 (CH3(CH2)7CHCH(CH2)5CH2CH2C(O)), 22.54, 27.07, 28.99, 29.07, 29.13, 29.18, 29.39, 29.58, 29.63, 29.94, 31.79 (CH3(CH2)7CHCH(CH2)5CH2CH2C(O)), 29.76 (C-2'), 33.87 (CH3(CH2)7CHCH(CH2)5CH2CH2C(O)), 53.89 (N(CH3)**3**), 55.54 (-OCH3), 59.33 (C-α), 63.35 (C-1), 63.81 (C-3), 66.15 (C-β), 70.09 (C-2), 101.52 (C-4'''), 111.50 (C-6''') , 112.31 (C-3'''), 114.86 (C-7'''), 129.15 (C-4'' and C-6''), 129.55 and 129.91 (CH=CH), 130.63 and 130.81 (C-7a''' and C-2''), 131.10 (C-3'' and C-7''), 133.69 (C-2'''), 136.00 (C-4a'''), 139.45 (C-5''), 156.06 (C-5'''), 168.67 (C-1''), 171.05 (C-1'), 173.55 CH3(CH2)7CHCH(CH2)7**C**(O)), **31P NMR (243 MHz, CDCl3:CD3OD, 2:1, v/v) δ:** – 4.02.**ESI-MS** m/z calculated for C45H66ClN2O10P: [M+H]+ 861,4222. Found 861.4225.

***1-Oleoyl-2-indomethacinoyl-sn-glycero-3-phosphocholine (OA-IND-PC) (20)***


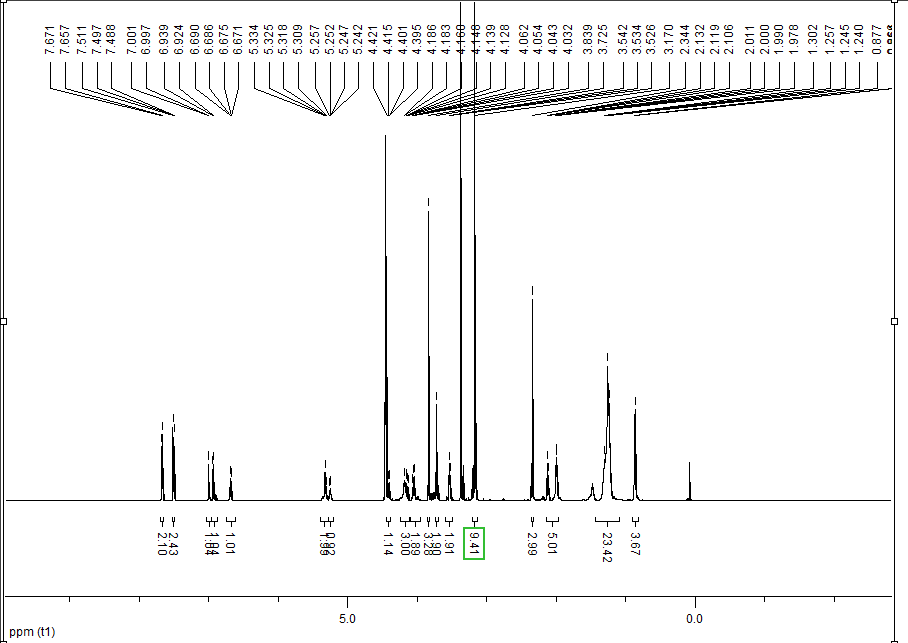


**Figure S25.** 1H NMR spectrum (600 MHz, CDCl3:CD3OD) of *OA-IND-PC.*


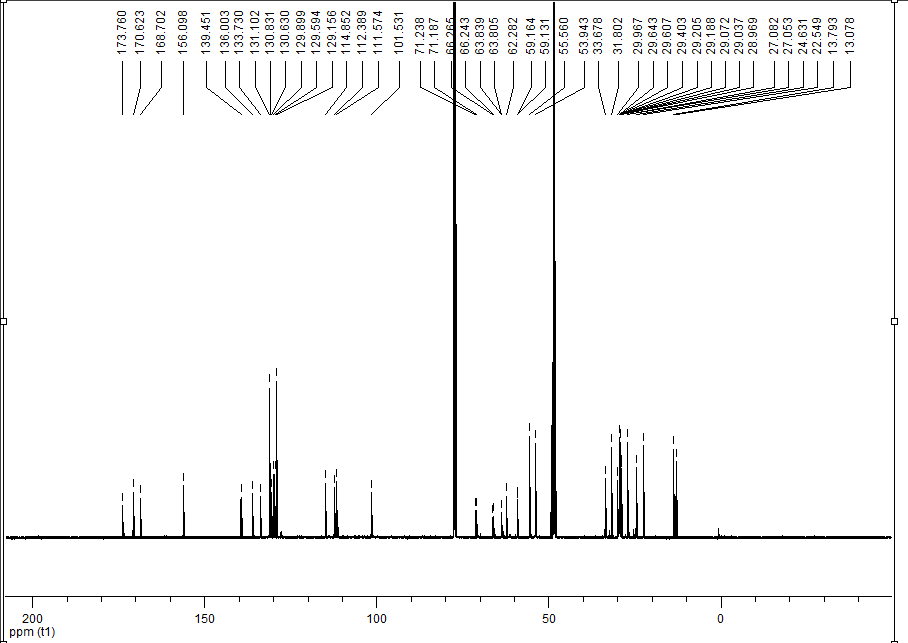


**Figure S26.** 13C NMR spectrum (150 MHz, CDCl3:CD3OD) of *OA-IND-PC*.


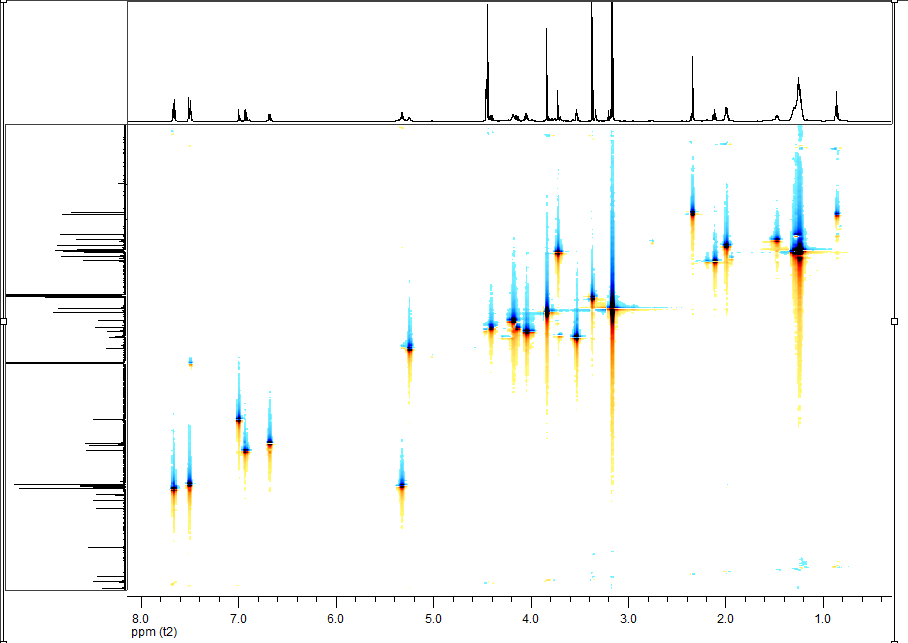


**Figure S27.** HSQC spectrum (600 MHz, CDCl3:CD3OD) of *OA-IND-PC*.


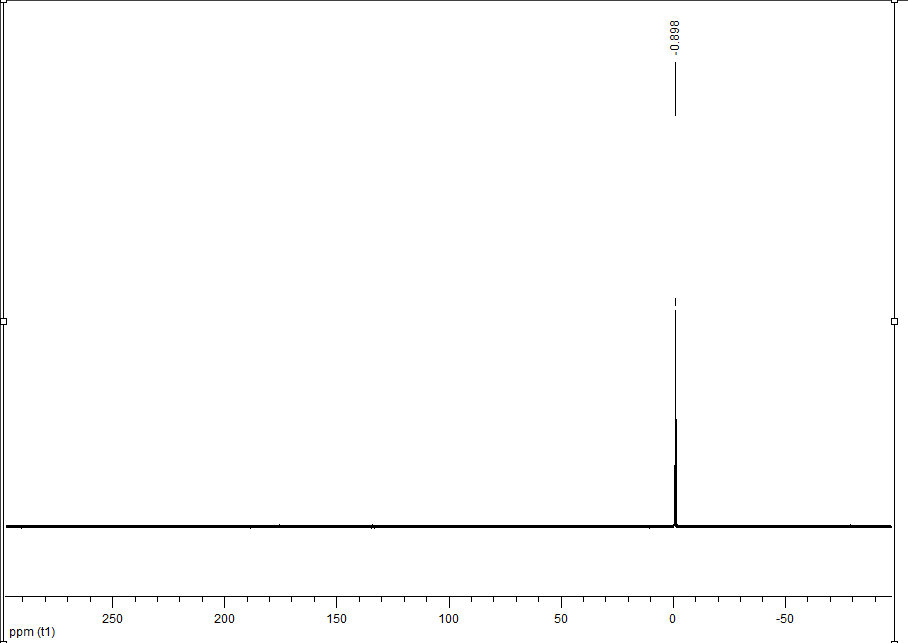


**Figure S28.** 31P spectrum (243 MHz, CDCl3:CD3OD) of *OA-IND-PC*.
